# Supplementary material
Source: PubMed Central journal article supplement (PMC4049088)
Supplement: NIHMS549520-supplement-FA1.pdf [file NIHMS549520-supplement-FA1.pdf]

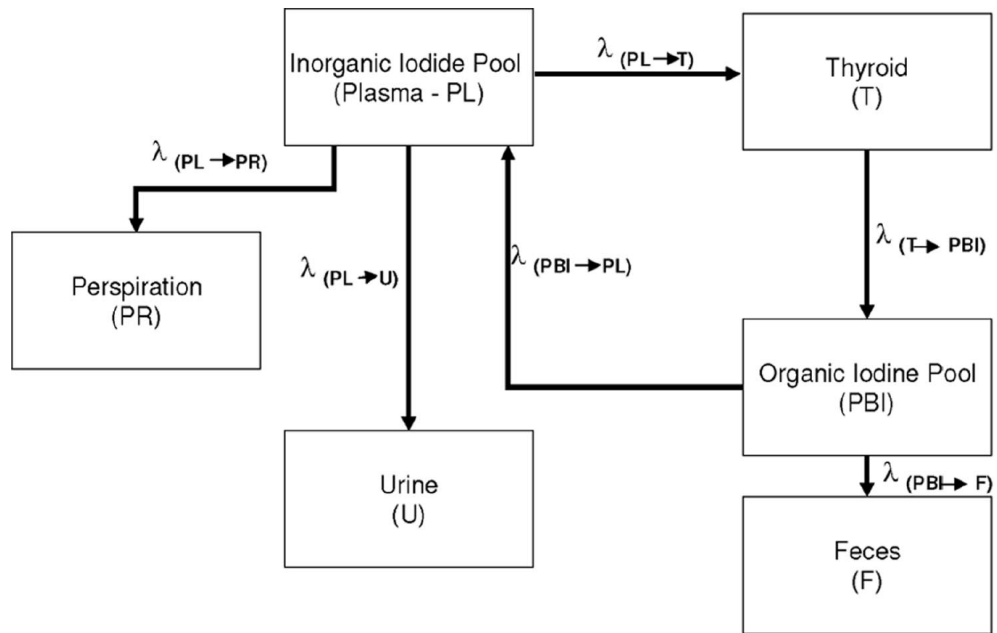

| Set | Transfer rates (d <sup>-1</sup> ) |         |          |         |        |         |
|-----|-----------------------------------|---------|----------|---------|--------|---------|
|     | PL → T                            | T → PBI | PBI → PL | PBI → F | PL → U | PL → PR |
| 1b  | 1.1969                            | 0.0095  | 0.0760   | 0.0190  | 1.6591 | 0.8741  |
| 2b  | 1.7365                            | 0.0095  | 0.0760   | 0.0190  | 1.1571 | 1.2681  |

**Fig. A1.** Schematic diagram of modified ICRP (1993) thyroid recycling model incorporating a pathway for iodine elimination via perspiration and transfer rates for two preferred data sets of physiological parameters (1b and 2b); see text and Table A1.
