# Supplementary material
Source: PubMed Central journal article supplement (PMC4049088)
Supplement: NIHMS549520-supplement-FA2.pdf [file NIHMS549520-supplement-FA2.pdf]

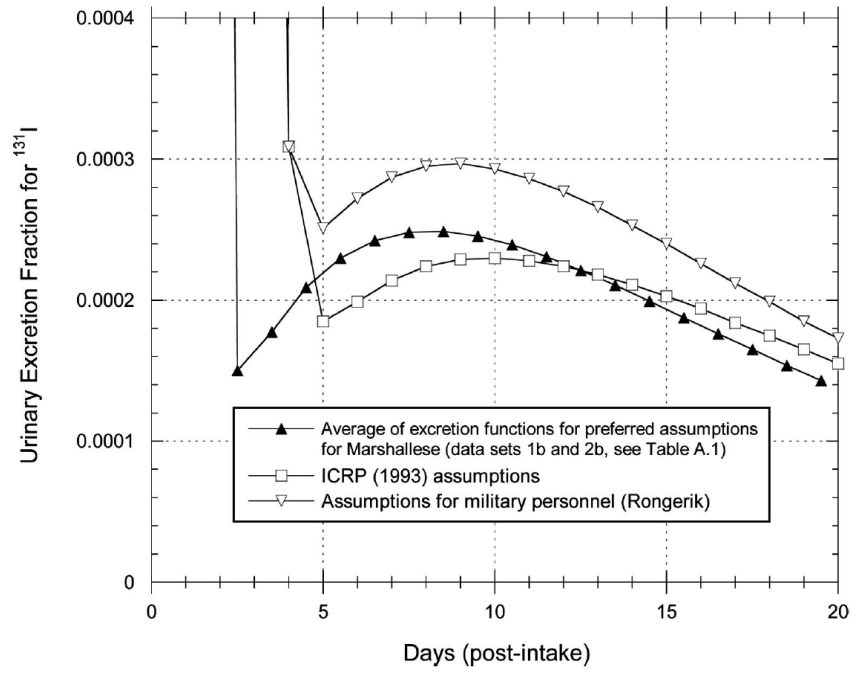

**Fig. A2.** Comparison of temporal pattern of urinary excretion fractions for  $^{131}\text{I}$  as derived from simulation of a thyroid biokinetic model (see text) for (i) average of functions for two sets of preferred assumptions for Marshallese (see Table A.1), (ii) ICRP (1993) assumptions, and (iii) assumptions for military personnel on Rongerik. Note that the values of the excretion fraction were only used for days of urine sampling (day 16, 17, and 19 for Marshallese, and day 19 for Rongerik military personnel).
