# Supplementary material
Source: PubMed Central journal article supplement (PMC4049088)
Supplement: NIHMS549520-supplement-TA1.pdf [file NIHMS549520-supplement-TA1.pdf]

**Table A1.** Six possible sets of parameter values for thyroid biokinetic model for Marshallese and for American military personnel on Rongerik. Parameter sets 1b and 2b were preferred for Marshallese (see text).

| Parameter sets                                                   | Water intake<br>(L d <sup>-1</sup> ) | Water loss<br>via urine<br>(L d <sup>-1</sup> ) | Water loss via<br>perspiration<br>(L d <sup>-1</sup> ) | Concentration of iodine<br>in perspiration<br>( $\mu\text{g L}^{-1}$ ) | Iodine loss<br>via perspiration<br>( $\mu\text{g d}^{-1}$ ) | Fractional<br>uptake |
|------------------------------------------------------------------|--------------------------------------|-------------------------------------------------|--------------------------------------------------------|------------------------------------------------------------------------|-------------------------------------------------------------|----------------------|
| Marshallese                                                      |                                      |                                                 |                                                        |                                                                        |                                                             |                      |
| 1a                                                               | 1.5                                  | 0.5                                             | 1.0                                                    | 37                                                                     | 37.0                                                        | 0.35                 |
| 1b (preferred)                                                   | 2.0                                  | 0.5                                             | 1.5                                                    | 37                                                                     | 55.5                                                        | 0.32                 |
| 1c                                                               | 2.5                                  | 0.5                                             | 2.0                                                    | 37                                                                     | 74.0                                                        | 0.30                 |
| 2a                                                               | 1.5                                  | 0.5                                             | 1.0                                                    | 37                                                                     | 37.0                                                        | 0.42                 |
| 2b (preferred)                                                   | 2.0                                  | 0.5                                             | 1.5                                                    | 37                                                                     | 55.5                                                        | 0.42                 |
| 2c                                                               | 2.5                                  | 0.5                                             | 2.0                                                    | 37                                                                     | 74.0                                                        | 0.42                 |
| Average of data<br>sets 1b and 2b<br>(applied to<br>Marshallese) | —                                    | —                                               | —                                                      | —                                                                      | —                                                           | —                    |
| Military personnel<br>(Rongerik Atoll)                           | 2.0                                  | 1.1                                             | 0.9                                                    | 37                                                                     | 33.3                                                        | 0.30                 |

**Table A1.** (Continued)

| Parameter sets                                                   | Iodine intake<br>( $\mu\text{g d}^{-1}$ ) | Iodine loss via<br>feces ( $\mu\text{g d}^{-1}$ ) | Iodine loss via<br>urine ( $\mu\text{g d}^{-1}$ ) | $^{131}\text{I}$ urinary<br>excretion day 16 | $^{131}\text{I}$ urinary<br>excretion day 17 | $^{131}\text{I}$ urinary<br>excretion day 19 |
|------------------------------------------------------------------|-------------------------------------------|---------------------------------------------------|---------------------------------------------------|----------------------------------------------|----------------------------------------------|----------------------------------------------|
| Marshallese                                                      |                                           |                                                   |                                                   |                                              |                                              |                                              |
| 1a                                                               | 158                                       | 15.2                                              | 105                                               | $2.32 \times 10^{-4}$                        | $2.17 \times 10^{-4}$                        | $1.88 \times 10^{-4}$                        |
| 1b (preferred)                                                   | 176                                       | 15.2                                              | 105                                               | $1.97 \times 10^{-4}$                        | $1.85 \times 10^{-4}$                        | $1.60 \times 10^{-4}$                        |
| 1c                                                               | 194                                       | 15.2                                              | 105                                               | $1.70 \times 10^{-4}$                        | $1.59 \times 10^{-4}$                        | $1.38 \times 10^{-4}$                        |
| 2a                                                               | 121                                       | 15.2                                              | 69                                                | $2.12 \times 10^{-4}$                        | $1.98 \times 10^{-4}$                        | $1.72 \times 10^{-4}$                        |
| 2b (preferred)                                                   | 121                                       | 15.2                                              | 51                                                | $1.55 \times 10^{-4}$                        | $1.45 \times 10^{-4}$                        | $1.26 \times 10^{-4}$                        |
| 2c                                                               | 121                                       | 15.2                                              | 32                                                | $9.84 \times 10^{-5}$                        | $9.21 \times 10^{-5}$                        | $7.99 \times 10^{-5}$                        |
| Average of data<br>sets 1b and 2b<br>(applied to<br>Marshallese) | —                                         | —                                                 | —                                                 | $1.76 \times 10^{-4}$                        | $1.65 \times 10^{-4}$                        | $1.43 \times 10^{-4}$                        |
| Military personnel<br>(Rongerik Atoll)                           | 194                                       | 15.2                                              | 145                                               | —                                            | —                                            | $1.85 \times 10^{-4}$                        |
